# Supplementary material for: Preparation of polymersomes in pure water for facile antibacterial applications
Source: Royal Society of Chemistry journal article supplement (doi:10.1039/c5ra10511k), 2015-01-01
Supplement: c5ra10511k1.pdf [file c5ra10511k1.pdf]

Electronic Supplementary Information for

## Preparation of polymersomes in pure water for facile antibacterial applications

Tao Wang,<sup>a</sup> Jinhui Jiang,<sup>a</sup> Yufen Xiao,<sup>a</sup> Yijie Zou,<sup>a</sup> Jingyi Gao,<sup>a</sup> and Jianzhong Du<sup>a,b,\*</sup>

<sup>a</sup> Key Laboratory of Advanced Civil Engineering Materials of Ministry of Education, School of Materials Science and Engineering, Tongji University, 4800 Caoan Road, Shanghai 201804, China.

<sup>b</sup> Shanghai Tenth People's Hospital, Tongji University School of Medicine, 301 Middle Yanchang Road, Shanghai 200072, China.

Email: jzdu@tongji.edu.cn; Fax: +86-21-6958 4723; Tel: +86-21-6958 0239

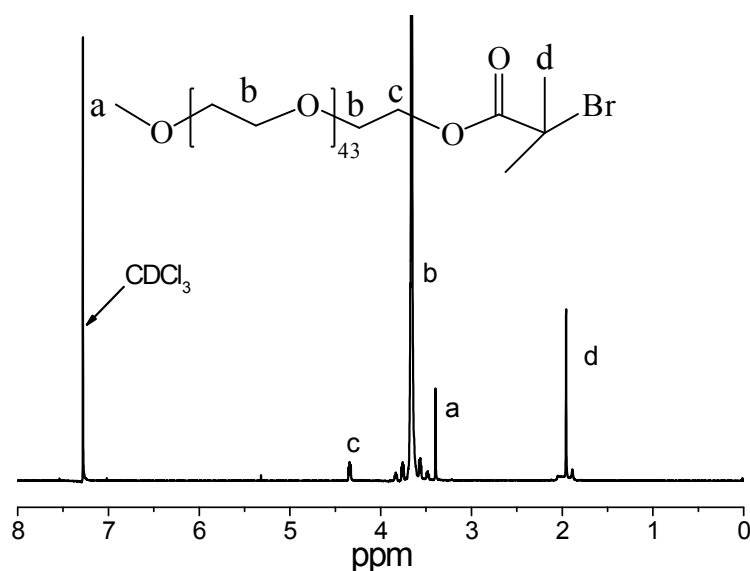

Fig. S1. <sup>1</sup>H NMR spectrum of PEO<sub>43</sub>-Br. The esterification efficiency is over 95%, which was calculated by comparing peak d with peak b.

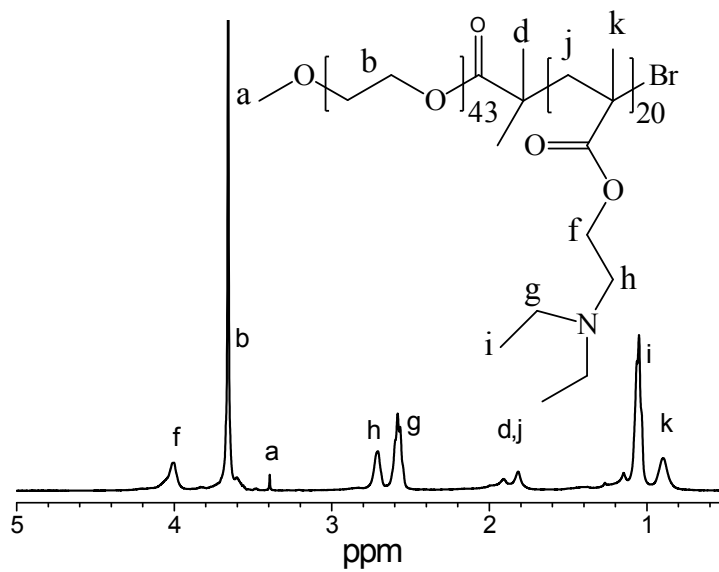

Fig. S2. <sup>1</sup>H NMR spectrum of PEO<sub>43</sub>-*b*-PDEA<sub>20</sub>-Br. Peaks a, b and d are assigned to the protons from PEO-Br. Peaks f to k are attributed to the protons of PDEA.
